# Supplementary material
Source: publisher site journal article supplement (https://www.spandidos-publications.com/2386/downloadSupplementary)

Figure S1. PTX inhibits viability of A2780 and SKOV3 cells but does not inhibit cell growth in A2780/T cells. The number of apoptotic cells in five random high-power microscopic fields was detected under a light microscope (as shown in Fig. 1B) (repeated three times), and the percentage of viable (A) A2780, (B) SKOV3 and (C) A2780/T cells was further calculated. Comparisons between the groups were performed using one-way ANOVA, followed by Tukey's multiple comparison test. \* $P<0.05$ , \*\*\* $P<0.0001$ .

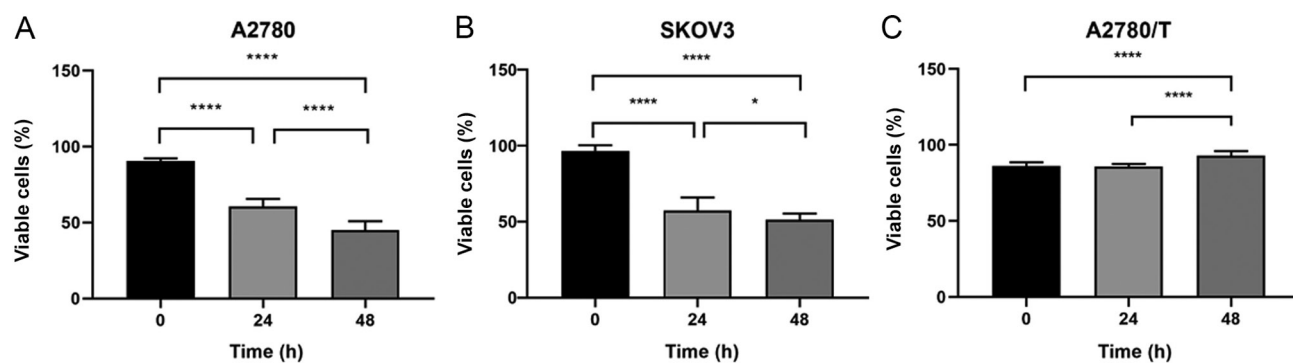

Supplement: Supplementary file 1 [file downloadSupplementary]
